# Supplementary material for: Sec24D-Dependent Transport of Extracellular Matrix Proteins Is Required for Zebrafish Skeletal Morphogenesis
Source: PubMed Central journal article supplement (PMC2860987; doi:10.1371/journal.pone.0010367), 2010-04-28
Supplement: pone.0010367.s001.pdf [file pone.0010367.s001.pdf]

## The Sec24D primary structure is highly conserved during evolution

|                    |                                                                     |     |
|--------------------|---------------------------------------------------------------------|-----|
| <i>H. sapiens</i>  | MSQQGYVATPPYSQFQPGIG-----LSPPHYGHYGDPS--HTASPTGMMKPAAGPLG           | 49  |
| <i>M. musculus</i> | MSQQGYVATPPYSQSQPGMG-----ISPPHYGHYGDPS--HASSPPGVMKPLGSPS-           | 48  |
| <i>T. rubripes</i> | MSQQGYVAAPPYSQAQPRMGGYQGGFGPFAQPMNGHYGGPPQAFTAPPPTGMMKPP----        | 56  |
| <i>D. rerio</i>    | MSQQGYVATPPYSQAQAGMGGYAAGFGNPPQSHYGHYAGSPTQGYSAAPPPTGVLKPP----      | 56  |
|                    | *****:*****.*.*:*                                                   |     |
|                    | . . . * * * . * . . . : . * . : * *                                 |     |
| <i>H. sapiens</i>  | ATATRGMLPPGPPPPGPHQFQNGAHATGHPQRFPGPPPVNNVASSHAPYQPSAQSSYP          | 109 |
| <i>M. musculus</i> | -AAPSGMLPPGPPPPGPHQFQNGAHTGHPQRFPGPPPVNSVAPSYASGQTLPPQSSYP          | 107 |
| <i>T. rubripes</i> | -VSS-GAMPP---PP--SQFSPN-MQHNG--PQSY-----AASAAQYQPP---YNSMA          | 97  |
| <i>D. rerio</i>    | -ASSPSGMPP---PPVSSQYGTN-IQONGAHPSFPPPVSSSPSMSPYQPPPTAFHSM           | 111 |
|                    | . . . . : * * * * * : * * * * * : * * * * * : * * * * * : * * * * * |     |
| <i>H. sapiens</i>  | GPISTSSVTQLGSQLSAMQINSYSGMAPPSPGPPGLSATSLQTTPRPPQPSILQPGSQ          | 169 |
| <i>M. musculus</i> | GPGSTSSVTQLGSQLSAMQINSYSGMAPPSPGPPGLSATSLQTTPRPPQPSILQPGHQ          | 167 |
| <i>T. rubripes</i> | S-QAPPPTQHLTNQMSAMNLSYVMGQP---QMPGPGQSP--QMSPPQSPSASMPMGPP          | 151 |
| <i>D. rerio</i>    | --QAPPPTQHLTNQMSAMNIAGYQRPV---QSPNSAPA--HFQTSPP---PVMGHPP           | 161 |
|                    | : . . . . : * * * * * : * * * * * : * * * * * . . . . .             |     |
| <i>H. sapiens</i>  | VLPPTTLNNGPASPPLPLMYRPDGLSGPPPPNAQYQPPPLPGQTLGAGYPPQAN---           | 226 |
| <i>M. musculus</i> | VPPPTTLNNGPASPMSPPTHRDGLGPAPLNAQYQPPPLPGQTLGAGYPPQATN---            | 225 |
| <i>T. rubripes</i> | MAGPPMAGPPMAG-PPMAGMG-RP--FGPSPPGGGFPQSPGTAVPPGYPPQPGQ---           | 204 |
| <i>D. rerio</i>    | LSPPGQPPSPLGSPPMATMGSM--APPMGMSGPPGPVVHQP-PHGPQYPPQPGSPIA           | 218 |
|                    | : * * * * * : * * * * * : * * * * * : * * * * * : * * * * *         |     |
| <i>H. sapiens</i>  | --SGPQMGAGQLS-----YPGGFPGGPAQMAP-PQPQKLLDPSIPSPQIWIENDRAS           | 277 |
| <i>M. musculus</i> | --YGPQMGAGQLS-----YPGGFPGGPAQMAPPAPQLQKLLDPSIPSPQIWIENDRAT          | 277 |
| <i>T. rubripes</i> | --FGGLIAGPQGG-----MPGAFPGAPGGLAGP---PQKLLDPSIPSTNRCVWQTQXD          | 253 |
| <i>D. rerio</i>    | GPYGAQMGAGPQMGAPQTGAFPGGFAQMAPG---PQKLLDPSIPSTQMIADDAK              | 275 |
|                    | * : * * * * * : * * * * * : * * * * * : * * * * * : * * * * *       |     |
| <i>H. sapiens</i>  | RG-----GQVYATNTRGQIPPLVTTDCMIQDQGNASPRFIRCTTYCFPCTSDMAKQAO          | 330 |
| <i>M. musculus</i> | RG-----GQVYATNTRGQVPPLVTTTCVQDQGHSSPRYIRCTTYCFPCTSDMAKQAO           | 330 |
| <i>T. rubripes</i> | RGRPDQNTGGRSKTNNIRGQVPPLVTTDFVQDQGNASPRYMRCTAYSLEPTADLAKQCO         | 313 |
| <i>D. rerio</i>    | RG-----GQVYATNTRGQVPPLVTTNFTVQDQGNASPRFMRCTTYSFPCTADLAKQCK          | 328 |
|                    | ** * : * * * * * : * * * * * : * * * * * : * * * * * : * * * * *    |     |
| <i>H. sapiens</i>  | IPLAAVIKPFATIPSNESPLYLVNHGSEGPVRCNRCKAYMCPFMQFIEGGRRYQCGFCNC        | 390 |
| <i>M. musculus</i> | IPLAAVIKPFADIPNETPLYLVNHGSEGPVRCNRCKAYMCPFMQFIEGGRRYQCGFCSC         | 390 |
| <i>T. rubripes</i> | VPLAATIIPLAALPKNEAPLYLVNHGETGPIRCNRCKAYMCPYMQFTDGGRRYQCSFCNC        | 373 |
| <i>D. rerio</i>    | VPLAAIKPFATVPKNETPLYLVNHGETGPIRCNRCKAYMCPYMQFIDGGRRYQCSFCSC         | 388 |
|                    | : * * * * * : * * * * * : * * * * * : * * * * * : * * * * *         |     |
| <i>H. sapiens</i>  | VNDVPPFYFQHLDHIGRRLDHYEKPELSLGSYEVATLDYCRKSKPPNPPAFIFMIDVSY         | 450 |
| <i>M. musculus</i> | VNEVPPFYFQHLDHIGRRLDHYEKPELSLGSYEVATLDYCRKNKPPNPPAFIFMIDVSY         | 450 |
| <i>T. rubripes</i> | VNEVPVFFYFQHLDMGRRVDFYERPELSLGSYEVATLDYCKNNKPPNPPAYIFMIDVSY         | 433 |
| <i>D. rerio</i>    | VNEVPVHYFQHLDMGRRMDLYERPELSLGSYEVATLDYCKNNKPPNPPAYIFMIDVSY          | 448 |
|                    | * * * * * : * * * * * : * * * * * : * * * * * : * * * * *           |     |
| <i>H. sapiens</i>  | SNIKNGLVKLICEELKTMLEKIPKEEETSARVGFITYNKVLHFFNVKSNLAQPQMMV           | 510 |
| <i>M. musculus</i> | SNIKNGLVKLICEELKTKRLPKKEEETSARVGFITYNKVLHFFNVKSNLAQPQMMV            | 510 |
| <i>T. rubripes</i> | NNVKSGLVKLICEELKTLQNLPRDGDASAIKVGFTYNNKILHFNKVSALAQPMV              | 493 |
| <i>D. rerio</i>    | NNIKSGLVRLICEELKTLDRLPKEEAGESSIKVGFVYNNKILHFNKVSALAQPMV             | 508 |
|                    | : * * * * * : * * * * * : * * * * * : * * * * * : * * * * *         |     |
| <i>H. sapiens</i>  | VTDVGEVFPVLLDGLFLVNYQESQSVIHNLDDQIPDMFADSNENETVFAVVIQAGMEALKA       | 570 |
| <i>M. musculus</i> | VTDVGEVFPVLLDGLFLVNYEESQSVIHNLDDQIPDMFADSNENETVFAVVIQAGMEALKA       | 570 |
| <i>T. rubripes</i> | VSDTAEMFVPLQDGLFLVSYQESRAVISNLLDQIPDMFADTGESVETVFAVVIQAGIEAFKA      | 553 |
| <i>D. rerio</i>    | VSDTAEMFVPLDGLFLVNFQESRAVINLLDQIPDMFADTNESETVFAVVIQAGLEALKA         | 568 |
|                    | : * * * * * : * * * * * : * * * * * : * * * * * : * * * * *         |     |
| <i>H. sapiens</i>  | ADCPGKLFIFHSSLPTAEAPGKLNRRDDKLVNTDKEKILFQPTNVYDSLAKDCVAHGC          | 630 |
| <i>M. musculus</i> | AECPGKLFIFHSSLPTAEAPGKLNRRDDKLVNTDKEKILFQPTAVYESLAKDCVANSC          | 630 |
| <i>T. rubripes</i> | AQCSGKLFIFHSSMPTAEAPGKLNRRDDKLVNTDKEKTLFQPKGVYEQLSKCVAGQC           | 613 |
| <i>D. rerio</i>    | AECGKLFIFHSSIPTAEAPGKLNRRDDKLVNTDKEKTLFQPKGVYEQLTDCVAGQC            | 628 |
|                    | : * * * * * : * * * * * : * * * * * : * * * * * : * * * * *         |     |
| <i>H. sapiens</i>  | SVTLFLFPPSYVDVASLGLVPLTGGTLYKYNFQMHLDROQFLNDRNDIEKIGFDAI            | 690 |
| <i>M. musculus</i> | SVTLFLFPPSYVDVASLGLVPLTGGTLYKYNFQIHSQRSFLTLNDRNDIEKIGFDAI           | 690 |
| <i>T. rubripes</i> | CVDLFLFPPSYVDVSTMGDVPTGGSVYKYSNFQVDVDEHFLRDLRNDVQKRVGFDAI           | 673 |

|                    |                                                               |      |
|--------------------|---------------------------------------------------------------|------|
| <i>D. rerio</i>    | CVDLFLFPNQYVDIATMGDVPSSHGGSIYKYSNFQVEVNGQQFLSDLSRDVEKSIQFDAL  | 687  |
|                    | *****                                                         |      |
| <i>H. sapiens</i>  | MRVRTSTGFRATDFFGGILMNNSTDVEMAAIDCDKAVTVEFKHDDKLSSEDSGALIQCAVL | 750  |
| <i>M. musculus</i> | MRVRTSTGFRATDFFGGIFMNNSTDVEMAAIDCDKAVTVEFKHDDKLSSEDSGALIQCAVL | 750  |
| <i>T. rubripes</i> | MRVRTSTGFRATDFFGAIFMNNSTDVEMAAVDCDKAVTVELKHDDALNEEAGALLQCALL  | 733  |
| <i>D. rerio</i>    | MRVRTGTFGRATDFFGAVYMNNSTDVEMAAVDCDKAVTVEFKHDDTLEESGAVMQCALL   | 748  |
|                    | *****                                                         |      |
| <i>H. sapiens</i>  | YTTISGQRRRLRIHNLGLNCSSQLADLYKSCETDALINFFAKSAFKAVLHQPLKVIREILV | 810  |
| <i>M. musculus</i> | YTTISGQRRRLRIHNLALNCSTQLADLYKSCETDALINFFAKSAFKAVLNQPLKAIREILV | 810  |
| <i>T. rubripes</i> | YTTIGGQRRRLRVHNLGLNCSSQLSELYKSCETDALINFFAKSAYRAILNQPLKSVREILV | 793  |
| <i>D. rerio</i>    | YTTIGGQRRRLRIHNLGLNCSSQLSELYKSCETDALINFFAKSAYRAMLNQPMKTVREILV | 808  |
|                    | *****                                                         |      |
| <i>H. sapiens</i>  | NQTAHMLACYRKNCASPSAASQLILPDSMKVLPVYMNCLLKNCVLLSRPEISDTERAYQR  | 870  |
| <i>M. musculus</i> | NQTAHMLACYRKHCCASPSAASQLILPDSMKVLPVYMNCLLKNCVLLSRSEISDTERAYQR | 870  |
| <i>T. rubripes</i> | NQTAHMLACYRKNCASPSAASQLILPDAMKVFVYMNCLLKNCVLLSRSEISDTERAYQR   | 853  |
| <i>D. rerio</i>    | NQTAHMLACYRKNCASPSAVSQLILPDAMKVFVYMNCLLKNCVLLSRSEISDTERAYQR   | 868  |
|                    | *****                                                         |      |
| <i>H. sapiens</i>  | QLVMTMGVADSQFFYPQLLPIHTLDVKSTMLPAAVRCSESRLESEGIFFLANGLHMFLW   | 930  |
| <i>M. musculus</i> | QLVMTMGVADSQFFYPQLLPIHTLDVKSAAALPAVRCSESRLESEGIFFLANGLHMFLW   | 930  |
| <i>T. rubripes</i> | LAVMAMGVEETQLLLYPRLIPLHNDVGAEPPTPLRCSEERLADAGVFFLENGHAMFLW    | 913  |
| <i>D. rerio</i>    | FMVNAMGVEETQVLLYPRLIPLHNDVGSSESLPAVRCSEERLNESEGMFFLENGLSMFLW  | 928  |
|                    | *****                                                         |      |
| <i>H. sapiens</i>  | LGVSSPPELIQGI FNVPSFAHINTDMLLPEVGNPYSQQLRMIMGIIQKRPYSMKLTIV   | 988  |
| <i>M. musculus</i> | FGVSSPPELIQGI FNVPSFAHINTDMASLPEVGSFHSQQLRMIMNIQKRPYSMKLIVV   | 990  |
| <i>T. rubripes</i> | LGOASPPDLIQNL FNVPSLAHLQAHMSVLPVLDNPLSKKVRGVIGDLEKRPYSMKLQIV  | 971  |
| <i>D. rerio</i>    | LGOACSPDLIQNL FNVPSFGHLPTEGTSLPVLDNAHSRKLHSIIRISQQRASMKLLIV   | 988  |
|                    | *****                                                         |      |
| <i>H. sapiens</i>  | KQREQPEMVFQRQFLVEDKGLYGGSSYVDFLCCVHKEICQLLN                   | 1032 |
| <i>M. musculus</i> | KQREQREMAFRQFLVEDKGLYGGSSYVDFLCCVHKEICQLLN                    | 1032 |
| <i>T. rubripes</i> | RQKDKPEMLFRQFLVEDKGLHGGASYMDFLCYIHREVRQLL-                    | 1014 |
| <i>D. rerio</i>    | KQKDRAEMSFRQLLVEDKGLHGGASYMDFLCFVHREIRQLLT                    | 1030 |
|                    | *****                                                         |      |

## Sarmah et al., Figure S1
