# Supplementary material for: Sec24D-Dependent Transport of Extracellular Matrix Proteins Is Required for Zebrafish Skeletal Morphogenesis
Source: PubMed Central journal article supplement (PMC2860987; doi:10.1371/journal.pone.0010367), 2010-04-28
Supplement: pone.0010367.s005.pdf [file pone.0010367.s005.pdf]

**Table S1.**

Sequences of primers and morpholino oligonucleotides used in this study

| Oligonucleotide  | Sequence                        |
|------------------|---------------------------------|
| F1               | 5'CAGTAAGATGAGTCAGCAAGG3'       |
| F2               | 5'GGTCAAAGGCCTGTGCAGTCTCC3'     |
| F3               | 5'CAAGGGAATGCCAGCCCGAGG3'       |
| F4               | 5'GACGCTGCTTGACCGACTTCC3'       |
| F5               | 5'CCCAATCAGTATGTGGATATCGC3'     |
| F6               | 5'CGTGAGGGAAATCCTGGTCAACC3'     |
| F7               | 5'CCTATGGCTAGGACAGGCCTG3'       |
| R1               | 5'GGAGACATAGAAGGAGATGAAG3'      |
| R2               | 5'CAGGTGACCAGAGGCGGCACCTG3'     |
| R3               | 5'CGCATATTAGTCTGACAAGTCC3'      |
| R4               | 5'GGAAGAGGTGACACAACATCCC3'      |
| R5               | 5'CGGCTGGTTGAGCATCGCCCG3'       |
| R6               | 5'GACACATCCATAGTGTGCAGCGGG3'    |
| R7               | 5'CTGTGAGAGGGTTAAGTGAGC3'       |
| <i>β-actin-F</i> | 5'-CCATGGATGAGGAAATCGCTGC-3'    |
| <i>β-actin-R</i> | 5'-GTCACACCATCACCAGAGTCC-3'     |
| S3UTRF           | 5'GCTTCGTCCACCGCGAGATCC3'       |
| S3UTRR           | 5'GGTGTGATGATTTTCATCCCTGAAGTC3' |
| BipF             | 5'CAGGAAAGAGTAAAACAGCAACCG3'    |
| BipR             | 5'CCGAAATTTTGCTCTCACTGCATC3'    |
| Sil1F            | 5'CAGGAAAGAGTAAAACAGCAACCG3'    |
| Sil1R            | 5'CCGAAATTTTGCTCTCACTGCATC3'    |
| 24cF             | 5'GATTCGTCAGCTCCTGAGCTGAG3'     |
| 24cR             | 5'CACAGAACACCCAGTACAATCAAC3'    |
| 3cutrf           | 5'GATTCGTCAGCTCCTGAGCTGAG3'     |
| 3cutrr           | 5'CACAGAACACCCAGTACAATCAAC3'    |

Morpholino oligonucleotides

|                       |                           |
|-----------------------|---------------------------|
| <i>Sec24d</i> -MO     | CTTACTGTTATACCTCTTTCATTCC |
| <i>Sec24c</i> -ATG-MO | GGTTGACATTCATTCTCAGTTCATC |
| <i>Sec24c</i> -UTR-MO | CCTAATCTCACAAACTGCTTGATTG |
